# Supplementary material for: Association between C-reactive protein and risk of schizophrenia: An updated meta-analysis
Source: PubMed Central journal article supplement (PMC5650435; doi:10.18632/oncotarget.17995), 2017-05-18
Supplement: oncotarget-08-75445-s001.pdf [file oncotarget-08-75445-s001.pdf]

## Association between C-reactive protein and risk of schizophrenia: an updated meta-analysis

### SUPPLEMENTARY MATERIALS

#### Supplementary search strategy 1: Search strategy for pubmed

|                                                                                                     |
|-----------------------------------------------------------------------------------------------------|
| 1. " Schizophrenia"[Mesh]                                                                           |
| 2. " Psychotic Disorders"[Mesh]                                                                     |
| 3. 1 OR 2                                                                                           |
| 4. (schizophreni* OR schizoid OR psychosis OR schizophreniform OR schizoaffective) [Title/Abstract] |
| 5. 3 OR 4                                                                                           |
| 6. " C-Reactive Protein "[Mesh]                                                                     |
| 7. (CRP OR C-reactive protein OR hsCRP OR hs-CRP) [Title/Abstract]                                  |
| 8. 6 OR 7                                                                                           |
| 9. 5 AND 8                                                                                          |

#### Supplementary search strategy 2: Search strategy for embase

|                                                                                          |
|------------------------------------------------------------------------------------------|
| 1. 'schizophrenia'/exp                                                                   |
| 2. 'psychosis'/exp                                                                       |
| 3. 1 OR 2                                                                                |
| 4. (schizophreni* OR schizoid OR psychosis OR schizophreniform OR schizoaffective):ab,ti |
| 5. 3 OR 4                                                                                |
| 6. 'c reactive protein'/exp                                                              |
| 7. (CRP OR C-reactive protein OR hsCRP OR hs-CRP):ab,ti                                  |
| 8. 6 OR 7                                                                                |
| 9. 5 AND 8                                                                               |

#### Supplementary search strategy 3: Search strategy for the cochrane library

|                                                                                                                                |
|--------------------------------------------------------------------------------------------------------------------------------|
| 1. MeSH descriptor: [Schizophrenia] explode all trees                                                                          |
| 2. MeSH descriptor: [Psychotic Disorders] explode all trees                                                                    |
| 3. 1 OR 2                                                                                                                      |
| 4. schizophreni* or schizoid or psychosis or schizophreniform or schizoaffective:ti,ab,kw (Word variations have been searched) |
| 5. 3 OR 4                                                                                                                      |
| 6. MeSH descriptor: [C-Reactive Protein] explode all trees                                                                     |
| 7. CRP or C-reactive protein or hsCRP or hs-CRP:ti,ab,kw (Word variations have been searched)                                  |
| 8. 6 OR 7                                                                                                                      |
| 9. 5 AND 8                                                                                                                     |
